# Supplementary material for: Strong nanozymatic activity of thiocyanate capped gold nanoparticles: an enzyme–nanozyme cascade reaction based dual mode ethanol detection in saliva
Source: Royal Society of Chemistry journal article supplement (doi:10.1039/d1nj03648c), 2021-12-06
Supplement: d1nj03648c1.pdf [file d1nj03648c1.pdf]

## Supporting Information

### **Strong Nanozymatic Activity of Thiocyanate Capped Gold Nanoparticles: An Enzyme-Nanozyme Cascade Reaction Based Dual Mode Ethanol Detection in Saliva**

Syed Rahin Ahmed, Greter Amelia Ortega, Satish Kumar, Seshasai Srinivasan\* and Amin Reza Rajabzadeh\*

School of Engineering Practice and Technology, McMaster University, 1280 Main Street West  
Hamilton, Ontario, Canada L8S 4L7

\*E-mail address: SS: [ssriniv@mcmaster.ca](mailto:ssriniv@mcmaster.ca), ARR: [rajaba@mcmaster.ca](mailto:rajaba@mcmaster.ca)

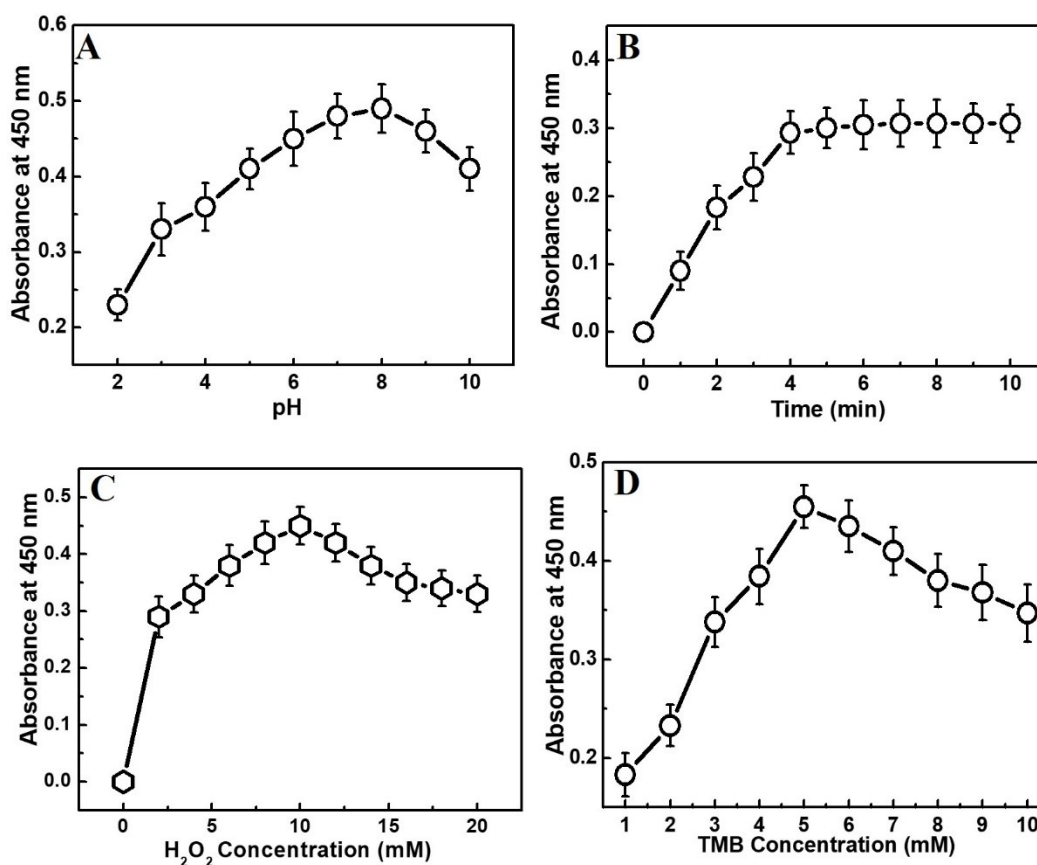

**Figure S1:** The nanozymatic activity of TC-Au NPs at different (A) pH values (Reaction conditions: 5 mM TMB and 10 mM H<sub>2</sub>O<sub>2</sub>); (B) Reaction times (Reaction conditions: 5-mM TMB, 10-mM H<sub>2</sub>O<sub>2</sub> and pH 7.5 at 25°C); (C) Varied H<sub>2</sub>O<sub>2</sub> concentrations with a fixed TMB concentration of 5 mM; and (D) Varied TMB concentrations with a fixed H<sub>2</sub>O<sub>2</sub> concentration of 10 mM. The reaction conditions were fixed at pH 7.5 and 25°C. The error bars denote the standard deviation (n=3).

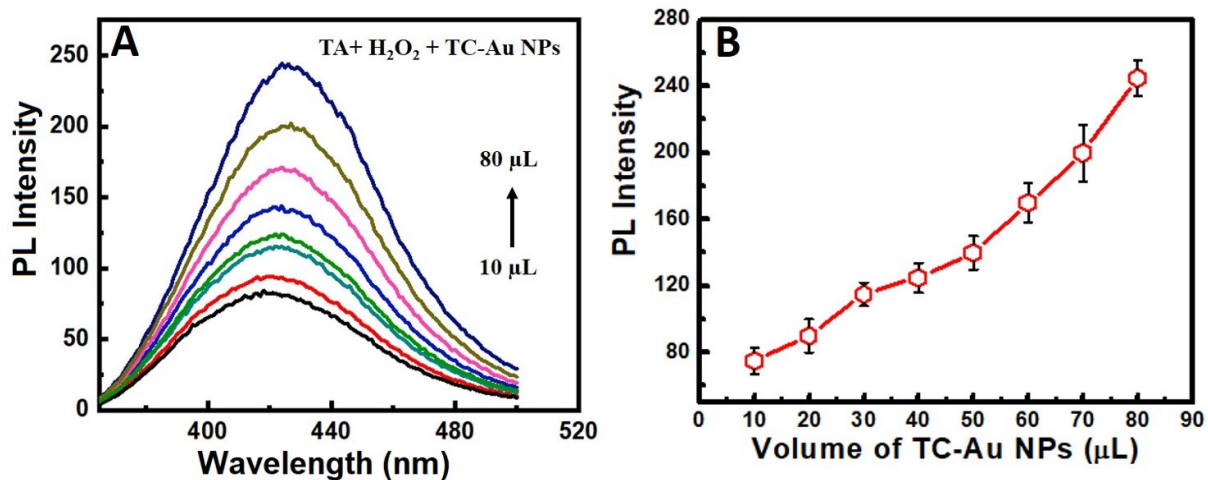

**Figure S2:** Nanozymatic activity study of TC-Au NPs: (A) TA based test of hydroxyl radical's formation by TC-Au NPs and (B) Calibration curve of PL intensity vs different volume of TC-Au NPs.

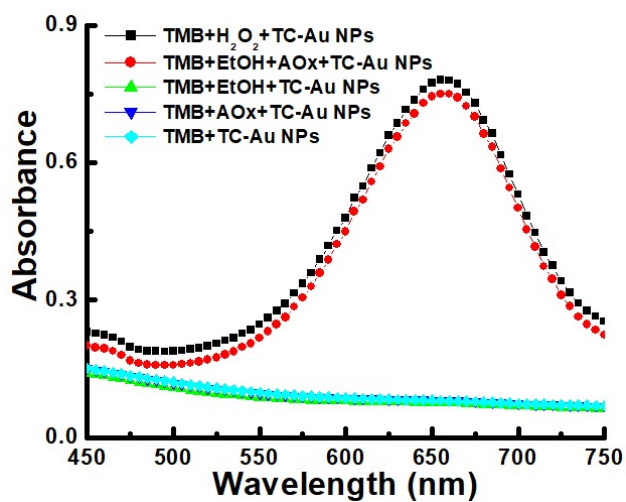

**Figure S3:** The specificity of EtOH detection in the presence different mixture solutions.

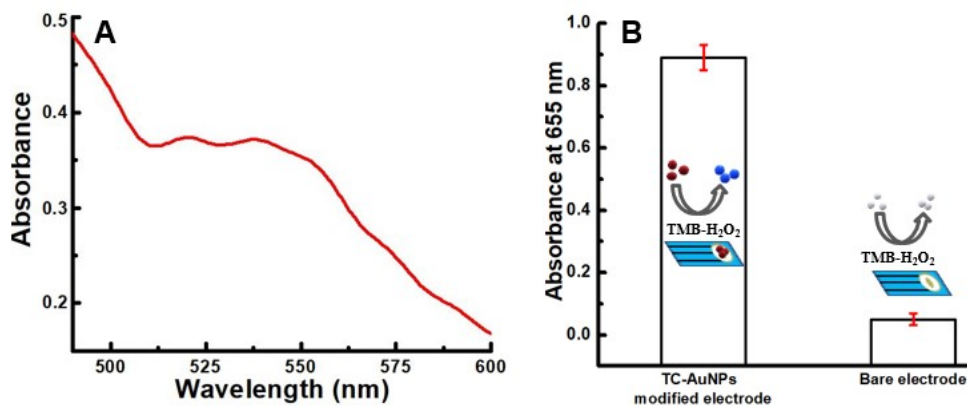

**Figure S4:** Confirmation of electrodes modification with TC-Au NPs: (A) absorbance of TC-Au NPs modified electrode; (B) nanozymatic nature of TC-Au NPs modified electrode in the presence of TMB-H<sub>2</sub>O<sub>2</sub>.

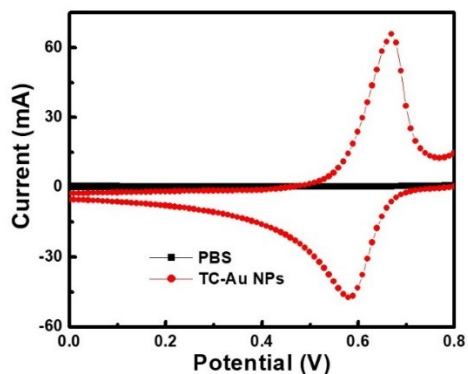

**Figure S5:** Electrochemical responses of TC-Au NPs.

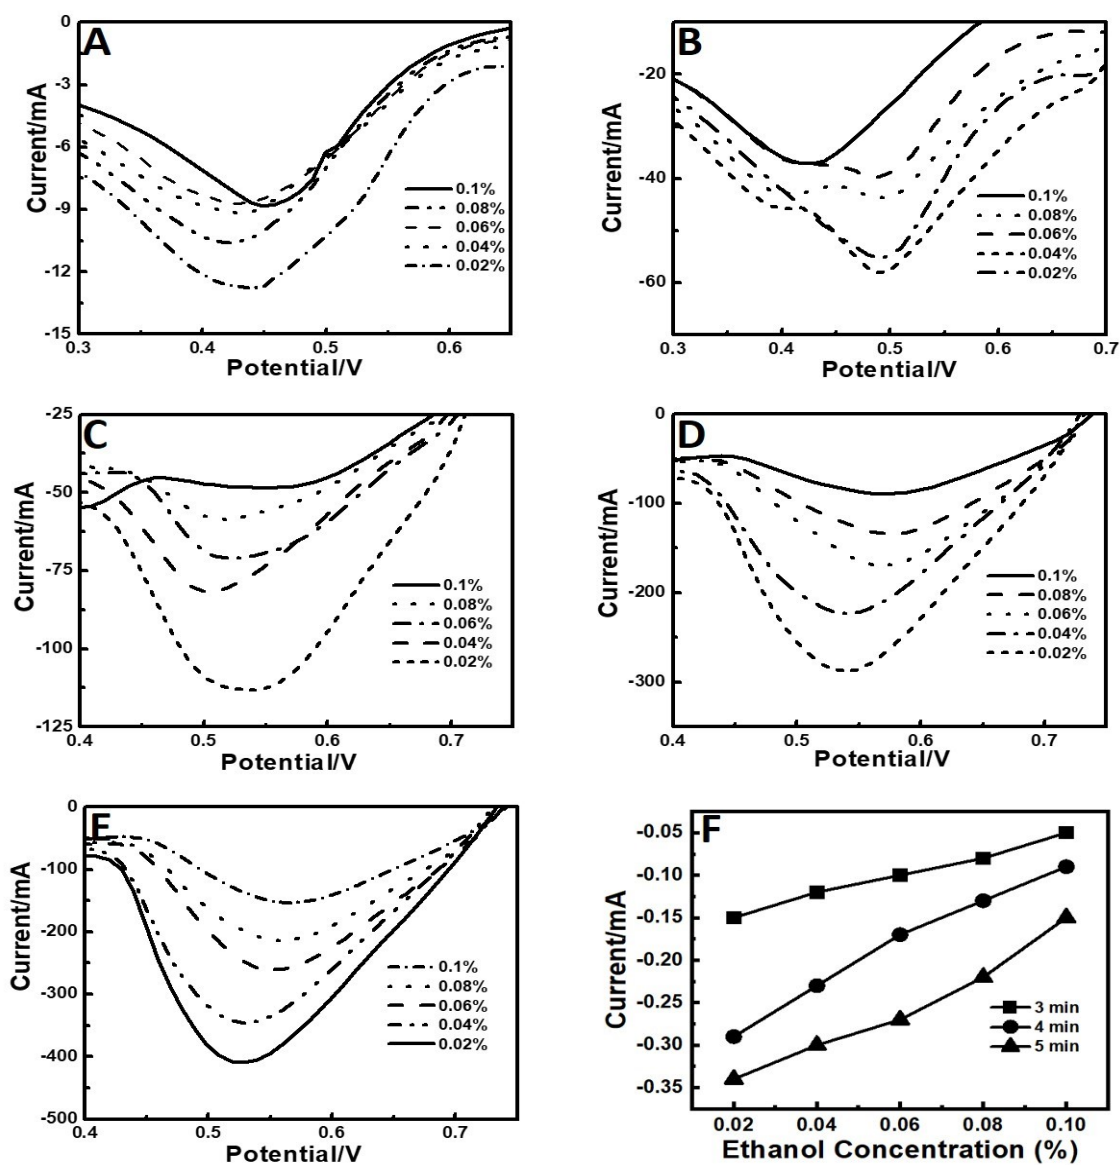

**Figure S6:** Electrochemical study of analytical performance: (A) CV of EtOH detection using reduction current of TMB within 1 min; (B) CV of EtOH detection using reduction current of TMB within 2 min; (C) CV of EtOH detection using reduction current of TMB within 3 min; (D) CV of EtOH detection using reduction current of TMB within 4 min; (E) CV of EtOH detection using reduction current of TMB within 5 min & (F) calibration curve of current vs EtOH at different concentration and time.

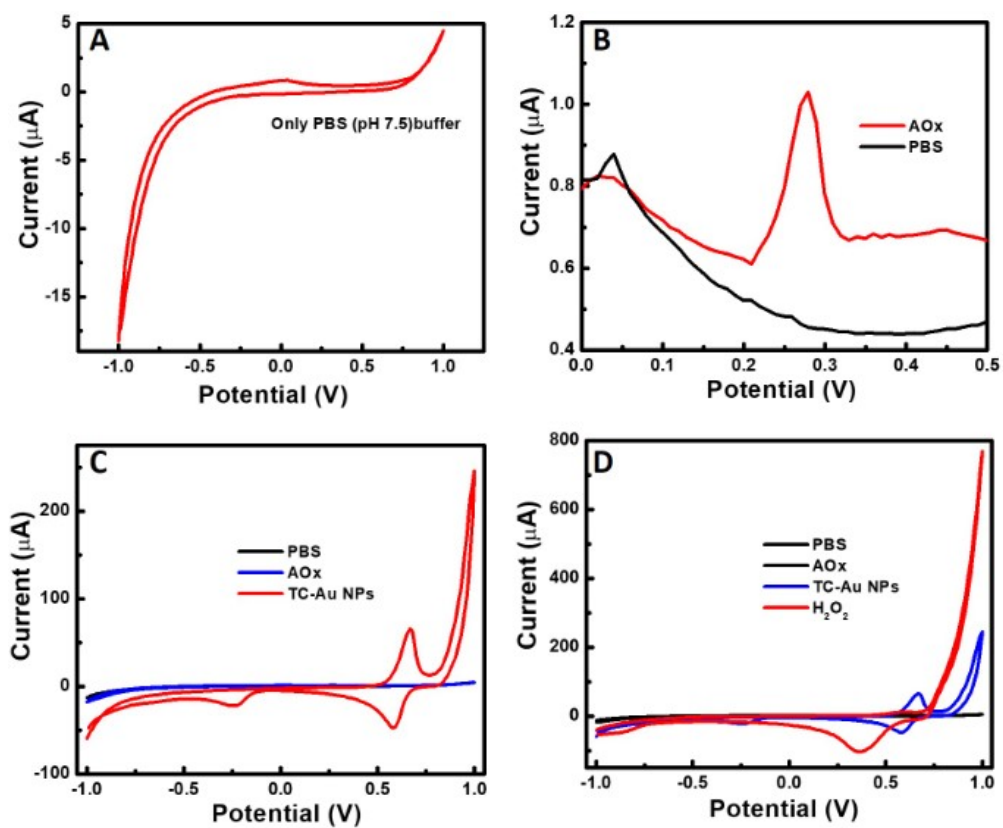

**Figure S7:** Electrochemical study of TC-Au NPs performance: (A) CV of bare PBS buffer; (B) CV of PBS buffer, AOx, and TC-Au NPs; and (D) CV of PBS buffer, AOx, TC-Au NPs, and  $\text{H}_2\text{O}_2$ .

**Table S1.** The enzyme-like activity of single-metal nanoparticles

| <b>Metal NPs</b> | <b>Enzyme-mimic</b> | <b>Ref. No</b> |
|------------------|---------------------|----------------|
| <b>Au</b>        | POD                 | 1              |
| <b>Au</b>        | OXD                 | 2              |
| <b>Au</b>        | CAT                 | 3              |
| <b>Au</b>        | SOD                 | 4              |
| <b>Ag</b>        | POD                 | 5              |
| <b>Ag</b>        | OXD                 | 6              |
| <b>Ag</b>        | CAT                 | 7              |
| <b>Cu</b>        | POD                 | 8              |
| <b>Pt</b>        | POD                 | 9              |
| <b>Pt</b>        | OXD                 | 10             |
| <b>Pt</b>        | CAT                 | 11             |
| <b>Ru</b>        | POD                 | 12             |
| <b>Ru</b>        | OXD                 | 12             |
| <b>Ir</b>        | POD-like activity   | 13             |
| <b>Ir</b>        | OXD-like activity   | 14             |
| <b>Ir</b>        | CAT                 | 15             |
| <b>Pd</b>        | POD                 | 16             |
| <b>Pd</b>        | OXD                 | 17             |
| <b>Pd</b>        | CAT                 | 18             |

**Table S2.** The enzyme-like activity of hybrid nanomaterials

| <b>Hybrid nanomaterials</b> | <b>Enzyme-mimic activity</b> | <b>Ref. No</b> |
|-----------------------------|------------------------------|----------------|
| <b>Au-Ag</b>                | POD                          | 19             |
| <b>Au-Pt</b>                | POD                          | 20             |
| <b>Au-Pd</b>                | POD                          | 21             |
| <b>Pt-Pd</b>                | POD                          | 22             |
| <b>Pt-Ru</b>                | Multiple                     | 23             |
| <b>Pt-Co</b>                | OXD                          | 24             |
| <b>Pd-Ir</b>                | POD                          | 25             |
| <b>Pt-Cu</b>                | POD                          | 26             |
| <b>Graphene-Pt</b>          | OXD                          | 27             |
| <b>Ni-Pd</b>                | POD                          | 28             |
| <b>Ce-MOF</b>               | OXD                          | 29             |
| <b>MOF (Ce/Fe)</b>          | POD                          | 30             |
| <b>Au-MOF</b>               | OXD                          | 31             |

**Table S3.** Comparison study of Michaelis-Menten constant ( $K_m$ ) of different capping agents of AuNPs.

| Nanozymes                    | Substrate                     | $K_m$ (mM) | $K_{cat}$ ( $s^{-1}$ ) | Ref. No    |
|------------------------------|-------------------------------|------------|------------------------|------------|
| Cysteamine-Au NPs            | TMB                           | 0.052      | $0.118 \times 10^3$    | 32         |
|                              | H <sub>2</sub> O <sub>2</sub> | 213        | $0.310 \times 10^3$    |            |
| Citrate -Au NPs              | TMB                           | 0.049      | $0.527 \times 10^3$    | 32         |
|                              | H <sub>2</sub> O <sub>2</sub> | 151        | $1.05 \times 10^3$     |            |
| Polyvinylpyrrolidone -Au NPs | TMB                           | 0.055      | $1.22 \times 10^3$     | 32         |
|                              | H <sub>2</sub> O <sub>2</sub> | 96         | $1.91 \times 10^3$     |            |
| Gum Arabic -Au NPs           | TMB                           | 0.094      | $1.82 \times 10^3$     | 32         |
|                              | H <sub>2</sub> O <sub>2</sub> | 84         | $2.23 \times 10^3$     |            |
| TC-Au NPs                    | TMB                           | 0.1        | $2.29 \times 10^4$     | This study |
|                              | H <sub>2</sub> O <sub>2</sub> | 343.04     | $2.4 \times 10^3$      |            |

## References

- (1) Jv Y, Li B, Cao R. 2010. Positively-Charged Gold Nanoparticles as Peroxidase Mimic and Their Application in Hydrogen Peroxide and Glucose Detection. *Chem. Commun.* 46(42):8017–19
- (2) Zhang H, Liang X, Han L, Li F. 2018. Non-Naked” Gold with Glucose Oxidase-Like Activity: A Nanozyme for Tandem Catalysis. *Small* 4(44):e1803256
- (3) Wang F, Ju E, Guan Y, Ren J, Qu X. 2017. Light-Mediated Reversible Modulation of ROS Level in Living Cells by Using an Activity-Controllable Nanozyme. *Small* 13(25): 1603051



- (4) Sharifi M, Faryabi K, Talaei AJ, Shekha MS, Ale-Ebrahim M, et al. 2020. Antioxidant Properties of Gold Nanozyme: A Review. *J. Mol. Liq.* 297(1):112004
- (5) Jiang H, Chen Z, Cao H, Huang Y. 2012. Peroxidase-like Activity of Chitosan Stabilized Silver Nanoparticles for Visual and Colorimetric Detection of Glucose. *Analyst* 137(23):5560–64
- (6) Song H, Li Z, Peng Y, Li X, Xu X, et al. 2019. Enzyme-Triggered in Situ Formation of Ag Nanoparticles with Oxidase-Mimicking Activity for Amplified Detection of Alkaline Phosphatase Activity. *Analyst* 144(7):2416–22
- (7) Li J, Liu W, Wu X, Gao X. 2015. Mechanism of PH-Switchable Peroxidase and Catalase-like Activities of Gold, Silver, Platinum and Palladium. *Biomaterials* 48:37–44
- (8) Hu L, Yuan Y, Zhang L, Zhao J, Majeed S, Xu G. 2013. Copper Nanoclusters as Peroxidase Mimetics and Their Applications to H<sub>2</sub>O<sub>2</sub> and Glucose Detection. *Anal. Chim. Acta.* 762:83–86
- (9) Cui Y, Lai X, Liang B, Liang Y, Sun H, Wang L. 2020. Polyethyleneimine-Stabilized Platinum Nanoparticles as Peroxidase Mimic for Colorimetric Detection of Glucose. *ACS Omega* 5(12):6800–6808
- (10) He SB, Yang L, Lin XL, Chen LM, Peng HP, et al. 2020. Heparin-Platinum Nanozymes with Enhanced Oxidase-like Activity for the Colorimetric Sensing of Isoniazid. *Talanta* 211:120707
- (11) Fan J, Yin JJ, Ning B, Wu X, Hu Y, et al. 2011. Direct Evidence for Catalase and Peroxidase Activities of Ferritin-Platinum Nanoparticles. *Biomaterials* 32(6):1611–18
- (12) Cao GJ, Jiang X, Zhang H, Croley TR, Yin JJ. 2017. Mimicking Horseradish Peroxidase and Oxidase Using Ruthenium Nanomaterials. *RSC Adv.* 7(82):52210–17
- (13) Cui M, Zhou J, Zhao Y, Song Q. 2017. Facile Synthesis of Iridium Nanoparticles with Superior Peroxidase-like Activity for Colorimetric Determination of H<sub>2</sub>O<sub>2</sub> and Xanthine. *Sens. Actuators B Chem.* 243:203–10
- (14) Cui M, Zhao Y, Wang C, Song Q. 2017. The Oxidase-like Activity of Iridium Nanoparticles, and Their Application to Colorimetric Determination of Dissolved Oxygen. *Microchim. Acta.* 184(9):3113–19
- (15) Wang Q, Hong G, Liu Y, Hao J, Liu S. 2020. Dual Enzyme-like Activity of Iridium Nanoparticles and Their Applications for the Detection of Glucose and Glutathione. *RSC Adv.* 10(42):25209–13
- (16) Zhou N, Zou S, Zou L, Shen R, Zhou Y, Ling L. 2019. Peroxidase-like Activity of Palladium Nanoparticles on Hydrogen-Bond Supramolecular Structures over a Broader pH Range and Their Application in Glucose Sensing. *Can. J. Chem.* 97(4):317–23

- (17) Shen X, Liu W, Gao X, Lu Z, Wu X, Gao X. 2015. Mechanisms of Oxidase and Superoxide Dismutation-like Activities of Gold, Silver, Platinum, and Palladium, and Their Alloys: A General Way to the Activation of Molecular Oxygen. *J. Am. Chem. Soc.* 137(50):15882–91
- (18) Ge C, Fang G, Shen X, Chong Y, Wamer WG, et al. 2016. Facet Energy versus Enzyme-like Activities: The Unexpected Protection of Palladium Nanocrystals against Oxidative Damage. *ACS Nano* 10(11):10436–45
- (19) Mohamad A, Keasberry NA, Ahmed MU. 2018. Enzyme-Free Gold-Silver Core-Shell Nanozyme Immunosensor for the Detection of Haptoglobin. *Anal. Sci.* 34(11):1257–63
- (20) Gao Z, Ye H, Tang D, Tao J, Habibi S, et al. 2017. Platinum-Decorated Gold Nanoparticles with Dual Functionalities for Ultrasensitive Colorimetric in Vitro Diagnostics. *Nano Lett.* 17(9):5572–79
- (21) Singh S, Tripathi P, Kumar N, Nara S. 2017. Colorimetric Sensing of Malathion Using Palladium-Gold Bimetallic Nanozyme. *Biosens. Bioelectron.* 92:280–86
- (22) Fan C, Liu J, Zhao H, Li L, Liu M, et al. 2019. Molecular Imprinting on PtPd Nanoflowers for Selective Recognition and Determination of Hydrogen Peroxide and Glucose. *RSC Adv.* 9(58):33678–83
- (23) Liu C, Yan Y, Zhang X, Mao Y, Ren X, et al. 2020. Regulating the Pro- and Anti-Oxidant Capabilities of Bimetallic Nanozymes for the Detection of Fe<sup>2+</sup> and Protection of: Monascus Pigments. *Nanoscale* 12(5):3068–75
- (24) Cai S, Qi C, Li Y, Han Q, Yang R, Wang C. 2016. PtCo Bimetallic Nanoparticles with High Oxidase-like Catalytic Activity and Their Applications for Magnetic-Enhanced Colorimetric Biosensing. *J. Mater. Chem. B* 4(10):1869–77
- (25) Xi Z, Gao W, Xia X. 2020. Size Effect in Pd–Ir Core-Shell Nanoparticles as Nanozymes. *Chem. bio. chem.* 21(17):2440–44
- (26) Lu Y, Ye W, Yang Q, Yu J, Wang Q, et al. 2016. Three-Dimensional Hierarchical Porous PtCu Dendrites: A Highly Efficient Peroxidase Nanozyme for Colorimetric Detection of H<sub>2</sub>O<sub>2</sub>. *Sens. Actuators B Chem.* 230:721–30
- (27) Qiu N, Liu Y, Guo R. 2020. Electrodeposition-Assisted Rapid Preparation of Pt Nanocluster/3D Graphene Hybrid Nanozymes with Outstanding Multiple Oxidase-Like Activity for Distinguishing Colorimetric Determination of Dihydroxybenzene Isomers. *ACS Appl. Mater. Interfaces* 12(13):15553–61
- (28) Wang Q, Zhang L, Shang C, Zhang Z, Dong S. 2016. Triple-Enzyme Mimetic Activity of Nickel-Palladium Hollow Nanoparticles and Their Application in Colorimetric Biosensing of Glucose. *Chem. Commun.* 52(31):5410–13

- (29) Xiong Y, Chen S, Ye F, Su L, Zhang C, et al. 2015. Synthesis of a Mixed Valence State Ce-MOF as an Oxidase Mimetic for the Colorimetric Detection of Biothiols. *Chem. Commun.* 51(22):4635–38
- (30) Yang H, Yang R, Zhang P, Qin Y, Chen T, Ye F. 2017. A Bimetallic (Co/2Fe) Metal-Organic Framework with Oxidase and Peroxidase Mimicking Activity for Colorimetric Detection of Hydrogen Peroxide. *Microchim. Acta.* 184(12):4629–35
- (31) Huang Y, Zhao M, Han S, Lai Z, Yang J, et al. 2017. Growth of Au Nanoparticles on 2D Metalloporphyrinic Metal-Organic Framework Nanosheets Used as Biomimetic Catalysts for Cascade Reactions. *Adv. Mater.* 29(32): 1700102
- (32) Liu C, Chen K, Su C, Yu P, Lee Po. 2019. Revealing the Active Site of Gold Nanoparticles for the Peroxidase-Like Activity: The Determination of Surface Accessibility. *Catalysts* 9: 517.
